# Supplementary material for: Efficient water-collection hybrid surface optimized through combination-hole arrangement and diversion groove structure design
Source: Royal Society of Chemistry journal article supplement (doi:10.1039/d4ta02890b), 2024-01-01
Supplement: d4ta02890b3.pdf [file d4ta02890b3.pdf]

## Supporting Information

# **Efficient water-collection hybrid surface optimized through combination-hole arrangement and diversion groove structure design**

Jing Zhao<sup>1,\*</sup>, Chuang Liu<sup>1</sup>, Zijin Cheng<sup>1</sup>, Ruoyu Sun<sup>1</sup>, Yixian Hu<sup>1</sup>, Jiliang Mo<sup>1,2</sup>

*<sup>1</sup>Key Laboratory of Advanced Technologies of Materials (Ministry of Education),  
School of Mechanical Engineering, Southwest Jiaotong University, Chengdu 610031,  
China*

*<sup>2</sup>State Key Laboratory of Traction Power, Southwest Jiaotong University, Chengdu  
610031, China*

\* Corresponding author.

E-mail address: jzhao@swjtu.edu.cn (Jing Zhao)

**Table. S1** The mass, falling time and the mass/time ratio of the first droplet on four hybrid surfaces

| <b>Sample</b>           | <b>0.5-1.5</b> | <b>1.0-1.5</b> | <b>0.5-2.0</b> | <b>1.0-2.0</b> |
|-------------------------|----------------|----------------|----------------|----------------|
| <b>Mass (mg)</b>        | 38             | 38             | 46             | 43             |
| <b>Falling time (s)</b> | 42             | 62             | 62             | 73             |
| <b>Mass/time (mg/s)</b> | 0.90           | 0.61           | 0.74           | 0.58           |

**Table. S2** The mass, falling time and the mass/time ratio of the first droplet on three hybrid surfaces

| <b>Samples</b>          | <b>0.5-1.0</b> | <b>0.5-1.5</b> | <b>0.5-2.0</b> |
|-------------------------|----------------|----------------|----------------|
| <b>Mass (mg)</b>        | 34             | 38             | 46             |
| <b>Falling time (s)</b> | 36             | 42             | 62             |
| <b>Mass/time (mg/s)</b> | 0.94           | 0.90           | 0.74           |
